# Supplementary material
Source: PubMed Central journal article supplement (PMC2567477)
Supplement: 0807270105_0807270105SI.pdf [file 0807270105_0807270105SI.pdf]

# Supporting Information

Brueggeman *et al.* 10.1073/pnas.0807270105

Table S1. Primers used for genotyping and sequencing in the *Rpg5/rpg4* region

| Primer    | Primer sequence 5'-3'      | Gene   | Clone   | Position | Amplicon, bp |
|-----------|----------------------------|--------|---------|----------|--------------|
| R4-F1     | TCAACCGCTTTCGCTCATATGCATG  | HvRGA1 |         | 118,020  | 715          |
| R4-R1     | GAAGTTGCTCTCCGATCCTGATC    |        |         | 117,306  |              |
| R4-F2     | TTGGCCGCTCGAATGGCAGCAGATC  | HvRGA1 |         | 117,553  | 1,038        |
| R4-R2     | CCCGTGAATGAATGTGCGCAAATAG  |        |         | 116,515  |              |
| R4-F3     | ATCTTGAGTGCATGTGGTGAACAC   | HvRGA1 |         | 116,750  | 909          |
| R4-R3     | TCCTACTAGTCCATACCAATCACAC  |        |         | 115,842  |              |
| R4-F4     | GATGGAATGTGGTCTAGGACTGTAG  | HvRGA1 |         | 115,984  | 1,060        |
| R4-R4     | TCTCTTTCGCTGGCAGATTCTTCTC  |        |         | 114,924  |              |
| R4-F5     | GAATCCCTGATAAGGCGATGGCTG   | HvRGA1 |         | 115,174  | 1,003        |
| R4-R5     | CTGCGTCAGCTTGCCTCTCAACTTG  |        |         | 114,172  |              |
| R4-F6     | GCTACTTGAAGTGAAGTGCACACAG  | HvRGA1 |         | 114,511  | 1,037        |
| R4-R6     | AACAGGTTTGCCTGCGACAGTAG    |        |         | 113,475  |              |
| R4-F13    | CTTGTGCACGGCCAAGATCCTGATG  |        |         | 113,606  | 1,010        |
| R4-R13    | ATCTGAGTGTTCAGCGAGACAAG    |        |         | 112,597  |              |
| R4-F14    | CAAACAGGTGTGCTGCAAATGGTTG  |        |         | 112,757  | 953          |
| R4-R14    | CAAGAGAGAGGAGGCTGAGATGAAC  |        |         | 111,805  |              |
| R4-F15    | ATATCCAGGATCCTACTGCACTGAC  |        |         | 111,967  | 1,007        |
| R4-R15    | GAAGAAGTCAAGTCCGCAAGGAAG   |        |         | 110,961  |              |
| R4-F16    | CGGAGGAAGTATTTCTCACCCATC   |        |         | 111,068  | 1,052        |
| R4-R16    | AAGCAAAGTGCAACGAAACAGCAG   |        |         | 110,017  |              |
| R4-F17    | AGAAACTCCTTCAAGGTCGGCCAC   |        |         | 110,098  | 935          |
| R4-R17    | CAAAAACCATGGAGTTGTACCCGAG  |        |         | 109,164  |              |
| R4-F18    | GAGCAAGACTCTTAGGGCGTGTGTTG |        |         | 109,319  | 1,006        |
| R4-R18    | TAGGGGACAGGATTTGCAACTCTGG  |        |         | 108,314  |              |
| R4-F19    | ACATTGTTGCACTTCAGTTGGGCTC  |        |         | 108,542  | 1,040        |
| R4-R19    | TTGTAGTGGAGAATGGAAGAGCCAC  |        |         | 107,503  |              |
| R4-F20    | CTTTCGTGTATACAGCATGAGCTTG  |        |         | 107,663  | 1,016        |
| R4-R20    | CCGACGACGTGTAGACGGAATGAC   |        |         | 106,648  |              |
| R4-F21    | CTCCATTCCGACCCGGATCATGATTC |        |         | 106,820  | 887          |
| R4-R21    | TTTGCCTGTATACTCACATGAGTAG  |        |         | 105,934  |              |
| R4-F22    | CGGATATAGGGAGAAGGGTTTGATG  |        |         | 106,152  | 897          |
| R4-R22    | GTCGTCCATCTTGTACACCACGAAC  |        |         | 105,256  |              |
| R4-F23    | GAACTCCTGCGAAATACTCGTAC    | HvAdf2 |         | 105,544  | 790          |
| R4-R23    | CGCGTGAACCGTCAATCATAACACAC |        |         | 104,754  |              |
| R4-F24    | CAGTCTTTGTTGACGATCATCATC   | HvAdf2 |         | 105,519  | 950          |
| R4-R24    | CTCGTCTAATCGTTGCCATTACGTG  |        |         | 104,570  |              |
| R4-F25    | GCTAGCTTTGTGCCGTGCATGTATC  | HvAdf2 |         | 104,707  | 1,029        |
| R4-R25    | AGATCCGAGGGACATACATGCAAG   |        |         | 103,679  |              |
| R45-F1    | GACGAAAAACCTGTCCGATCAGATC  |        | RSB1156 | 117,897  | 2,150        |
| R45-R1    | TTGTGCAACTCGCAATTGAAGGTAC  |        |         | 120,046  |              |
| R45-F2    | ACCCAGGTAAGAGGGACCATGTTAG  |        | RSB1157 | 119,849  | 2,006        |
| R45-R2    | GGGCGTGACATAGAGAGGGATGGAG  |        |         | 121,855  |              |
| R45-F3    | GAACGTTGCGAGCTGCACGTCCTAC  |        |         | 121,152  | 2,318        |
| R45-R3    | CAGCCTCTCAACAATGCCATGAATC  |        |         | 123,469  |              |
| R45-F4    | CCACCCTTACCAAGTATGTAGGTG   |        | RSB1166 | 123,293  | 2,424        |
| R45-R4    | ATGCGTCGTGGCTGAAGCCTCGAAG  |        |         | 125,717  |              |
| R5-F1     | CCGCCTACCACACCTCCGATTCCAC  | Rpg5   | RSB762  | -302*    | 1,087        |
| R5-R1     | TCAGGTTTGATGGCTGTCTCTGGAG  |        |         | +785*    |              |
| RpgQ-F3   | TGTGCCGGATGCGATCTGGACCTC   | Rpg5   | RSB762  | 492*     | 1,046        |
| RpgQ-R3   | TGAGGAGAGCGAACCAATGTACTTC  |        |         | 1,538*   |              |
| Rpg5-F4.2 | CATCAATGTTCTAACATGGCGTATC  | Rpg5   | RSB762  | 1,396*   | 1,153        |
| RpgQ-R4   | GATCGAACTTGGGACATTCTGATGC  |        |         | 2,548*   |              |
| Rpg5-F5.2 | GGTGTGTCATGTACAGTTGATCAC   | Rpg5   | RSB762  | 2,351*   | 1,259        |

| Primer    | Primer sequence 5'-3'         | Gene   | Clone   | Position | Amplicon, bp |
|-----------|-------------------------------|--------|---------|----------|--------------|
| Rpg5-R5.3 | CTATCTGAGATCTAACCGTGTATTG     |        |         | 3,609*   |              |
| RpgQ-F6   | AGATGCACCTATCTGCATCGAGCAC     | Rpg5   | RSB762  | 3,422*   | 1,017        |
| RpgQ-R6   | ATGTGAGCCTGAGACTACTGACAC      |        |         | 4,438*   |              |
| QK-F2     | CCCCATACTTCAAATTACACTTCGCTGCC | Rpg5   | RSB762  | 4,237*   | 1,016        |
| R5-R7.3   | GCAACCTTCATTCTGACAGACCATG     |        |         | 5,253*   |              |
| RQ4K-F1   | CTATTCAGAAGTATGCACTGACCAG     | Rpg5   | RSB762  | 5,024*   | 1,160        |
| RQ4K-R1   | GCACCCGCAACTCCTGTGTGTTGAC     |        |         | 6,183*   |              |
| RQ4K-F2   | ACGCCTCCGAGGAGGAGGTTTACAG     | Rpg5   | RSB762  | 5,994*   | 985          |
| RQ4K-R2   | GCTTTGGTTGAGCCGCAACAGACGAG    |        |         | 6,978*   |              |
| RQ4K-F3   | GCTGGGGATGCAAGCATAGAGCTG      | Rpg5   | RSB762  | 6,776*   | 1,001        |
| RQ4K-R3   | CACGCCAAAGCTATACACATCACTC     |        |         | 7,776*   |              |
| R54K-F4.2 | TGCATCTATCTGCTCATGCAAGGAG     | Rpg5   | RSB762  | 7,303*   | 1,082        |
| RCR1      | AACAATATTCACCTGCGGCACCAAC     |        |         | 8,384*   |              |
| HvPP2C-R2 | CCCGAGGTTTGCATGAAGAGAGTC      | HvPP2C |         | 156,716  |              |
| HvPP2C-R4 | ACGACCTGTATGATGCCTTTCACTC     | HvPP2C |         | 156,901  |              |
| RpgQ-J17  | TCTGGCCCTCTTGAGAGACTTGAG      | Rpg5   | RSB762  | 3,073*   |              |
| RpgQ-F11  | AGGATGACGCTACATACTCAGCGAG     | Rpg5   | RSB762  | 242*     |              |
| Rpg5-F13  | GAGGGACACGGTCCCGGTGAAGATG     | Rpg5   | RSB762  | 333*     |              |
| Rpg5-F14  | CAGTCTGATTCCGCTTCCGTTGAG      | Rpg5   | RSB762  | 297*     |              |
| Rpg5-F15  | GGATCCCCCATCACGGCTTTGCTC      | Rpg5   | RSB933  | 267*     | 2,080        |
| R5i-R1    | GTAGTTGGTGTCAACAGTTGGATC      |        |         | 2,346*   |              |
| Rpg5-F16  | ACCCTGGTGCCACGCCAAATGGTG      | Rpg5   | RSB762  | 512*     |              |
| Rpg5-F17  | ACCACTGTGGTCAGTAGTCCAGTAG     | Rpg5   | RSB762  | -390*    |              |
| Rpg5-F18  | TCCTCGTATTCAGCGAGGAGTGATG     | Rpg5   | RSB762  | -84*     |              |
| Rpg5-F19  | GCCTCCCCTGGACTATTGCTC         | Rpg5   | RSB762  | -121*    |              |
| Rpg5-F20  | ATGTGTCGAGGTCGGGAGCTCCTC      | Rpg5   | RSB762  | -145*    |              |
| ADF3-F1   | ATCATAACGAGCAGCTCCTGTC        | HvAdf3 |         | 161,306  | 701          |
| ADF3-R1   | AACCAAGCACTCAATTCTCGAAGAG     | HvAdf3 |         | 160,609  |              |
| ADF3-F1   | ATCATAACGAGCAGCTCCTGTC        | HvAdf3 |         | -79**    | 660          |
| Q ADF3-R1 | CGATCCCATGCGCAGGTATGCCAAG     | HvAdf3 |         | 580**    |              |
| 5112-F1   | AGTCATGGAGGTGTACACGTACGTG     |        |         | 161,422  | 976          |
| 5112-R1   | ATATGATTTCTGGTCGTCCTG         |        |         | 162,398  |              |
| 5112-F2   | ACGGATTGATTACGTGAAACATCAG     |        |         | 162,191  | 945          |
| 5112-R2   | CTTCTCCTCCCTCAAGTCTTCTTG      |        |         | 163,136  |              |
| 5112-F3   | GACCAACTCGAAGAAGGAGGACAAG     |        |         | 163,062  | 1,028        |
| 5112-R3   | CGGTGGTCGTCATAAATAAGACGAC     |        |         | 164,090  |              |
| 5112-F4   | AAAAGTGGACGCTCAATGCGTCGAC     |        |         | 163,911  | 985          |
| 5112-R4   | GCATGCTACTACTCGGCTGACTGTG     |        |         | 164,896  |              |
| 5112-F5   | CTCACCGTTGGACGGTCAAGCTGAC     |        |         | 164,739  | 1,008        |
| 5112-R5   | AGTTGCACGTTTGAATACCATCAG      |        |         | 165,747  |              |
| 5112-F6   | TTGGATTAGTTGTTGACCATCGAC      |        |         | 165,590  | 1,008        |
| 5112-R6   | ATTTGTATAAGCAATGTTGGTAGTC     |        |         | 166,598  |              |
| 5112-F7   | TTGAACACATGGTCAACATATTTTC     |        |         | 166,467  | 1,038        |
| 5112-R7   | GGGCCACCGACTGTAGCACTC         |        |         | 167,505  |              |
| 5112-F8   | GTAGCTGGACCGCTCATGACCATC      |        |         | 167,435  | 1,070        |
| 5112-R8   | TTAGCTTACTACGAGTCGAGCAC       |        |         | 168,504  |              |
| 5112-F9   | CTAACAGACGGTGGTGGAGGAAACG     |        |         | 168,461  | 1,017        |
| 5112-R9   | TTGAATGATGACTCTAATGGTGTG      |        |         | 169,477  |              |
| 5112-F10  | AGACTTGCATGCCTTTGCTAAGTAC     |        | RSB1090 | 169,343  | 1,351        |
| 5112-R10  | CCCCAAAACCTCATGCTTGGTACTC     |        |         | 170,693  |              |
| 5112-F11  | TCCGCTGAGAATTGGCATCCCTACTAC   |        | RSB1172 | 170,348  | 1,804        |
| 5112-R11  | CCGCCTAGCATGCATTTGTCTCCAGTG   |        |         | 172,151  |              |
| 5112-F17  | CAGGCACTCGAGCAACAATCGTCAC     |        | RSB1192 | 172,015  | 1,696        |
| 5112-R17  | TGGTAAGCCTGGACCGTTTATACAG     |        |         | 173,710  |              |
| 5112-F13  | CGCCCGACGAAAGAGAACGACAATG     |        | RSB1159 | 173,659  | 1,330        |
| 5112-R13  | GGGCCACCGACTGTAGCACTC         |        |         | 174,989  |              |
| 5112-F14  | CGCGTGCTTGTGTTTGTGGGTAC       |        | RSB1161 | 174,659  | 1,482        |
| 5112-R14  | GGCCCTGCTGAAATGCTAATAAA       |        |         | 176,141  |              |

The column labeled Clone refers to the plasmid clones generated by or containing the PCR amplicon. Positions designated with an asterisk (\*) are determined by the first nucleotide of the *Rpg5* start methionine codon, and positions designated with a double asterisk (\*\*) are determined by the first nucleotide of the *HvAdf3* start methionine codon from Q21861 genomic sequence (GenBank accession no. EU878778). All other positions are determined by the Morex genomic sequence (GenBank accession no. EU812563). Amplicon refers to the size of the PCR fragments generated with the specified primer pair.
